# Supplementary material for: Association between thrombocytopenia and 180-day prognosis of COVID-19 patients in intensive care units: A two-center observational study
Source: PubMed Central journal article supplement (PMC7972743; doi:10.1371/journal.pone.0248671), 2021-03-18
Supplement: pone.0248671.s003.pdf [file pone.0248671.s003.pdf]

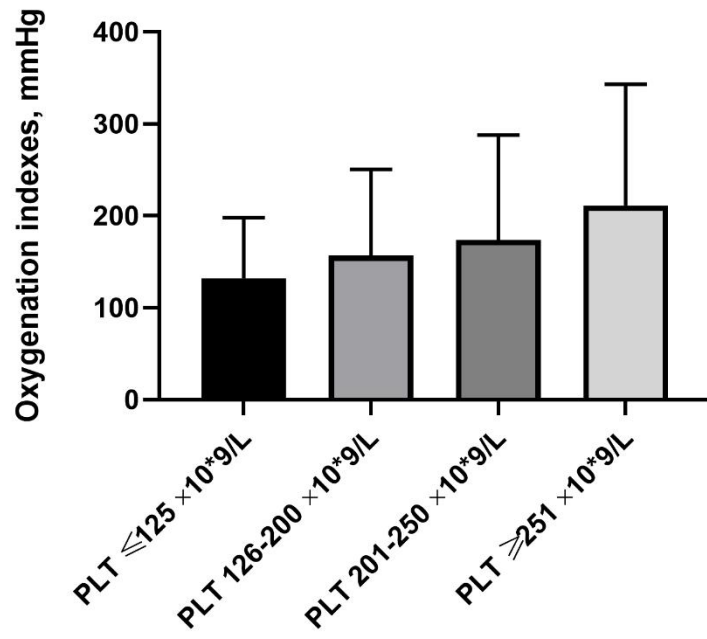

Fig 1. The platelet counts and oxygenation indexes at admission
