# Supplementary material for: Association between thrombocytopenia and 180-day prognosis of COVID-19 patients in intensive care units: A two-center observational study
Source: PubMed Central journal article supplement (PMC7972743; doi:10.1371/journal.pone.0248671), 2021-03-18
Supplement: pone.0248671.s005.pdf [file pone.0248671.s005.pdf]

Table 1. Subsequent changes of organ function.

| Variables                     | Days | Survival group          | Non-survival group     | P value |
|-------------------------------|------|-------------------------|------------------------|---------|
| Platelet count                | 1    | 209.00 [149.75-257.00]  | 172.00 [121.00-223.00] | <0.01   |
|                               | 3    | 186.00 [138.75-261.00]  | 166.00 [113.50-245.75] | 0.07    |
|                               | 7    | 233.000 [160.50-293.50] | 132.00 [95.25-237.50]  | <0.01   |
| six-point ordinal scale       | 1    | 4.00 [3.00-4.00]        | 4.00 [3.00-5.00]       | 0.06    |
|                               | 3    | 4.00 [3.00-4.00]        | 4.00 [4.00-5.00]       | <0.01   |
|                               | 7    | 3.50 [3.00-4.00]        | 5.00 [4.00-5.00]       | <0.01   |
| Oxygenation index             | 1    | 135.75 [89.53-238.14]   | 113.20 [86.90-202.80]  | 0.36    |
|                               | 3    | 201.30 [122.48-286.33]  | 151.70 [91.65-224.38]  | 0.03    |
|                               | 7    | 212.00 [146.82-295.84]  | 117.20 [82.80-182.20]  | <0.01   |
| SOFA                          | 1    | 3.50 [2.00-5.00]        | 5.00 [3.00-7.00]       | <0.01   |
|                               | 3    | 4.00 [3.00-5.00]        | 5.00 [4.00-7.00]       | <0.01   |
|                               | 7    | 3.00 [2.00-5.25]        | 5.00 [3.00-8.00]       | <0.01   |
| Creatinine, $\mu\text{mol/L}$ | 1    | 64.40 [53.60-89.70]     | 75.50 [56.80-134.20]   | 0.08    |
|                               | 3    | 64.30 [49.90-77.00]     | 77.50 [52.85-140.45]   | 0.07    |
|                               | 7    | 60.40 [48.70-75.30]     | 68.00 [49.70-189.90]   | 0.11    |
| blood urea, $\text{mmol/L}$   | 1    | 9.80 [6.30—15.10]       | 10.10 [6.20-16.44]     | 0.89    |
|                               | 3    | 6.20 [4.35-8.60]        | 9.30 [5.79-16.00]      | <0.01   |
|                               | 7    | 6.50 [4.50-8.40]        | 11.01 [6.80-20.60]     | <0.01   |
| AST, IU/L                     | 1    | 31.50 [19.80-55.50]     | 40.00 [24.00-65.00]    | 0.12    |
|                               | 3    | 29.50 [18.00-54.25]     | 36.50 [22.75-58.50]    | 0.22    |
|                               | 7    | 28.00 [19.00-53.25]     | 29.00 [20.75-51.50]    | 0.67    |
| ALT, IU/L                     | 1    | 29.00 [19.00-52.00]     | 34.00 [20.00-47.00]    | 0.74    |
|                               | 3    | 33.00 [19.00-61.75]     | 32.50 [18.00-49.00]    | 0.46    |
|                               | 7    | 36.50 [20.00-75.25]     | 25.00 [13.50-43.50]    | 0.01    |
| Lymphocyte percentage, %      | 1    | 9.90 [5.50-17.30]       | 6.70 [3.60-10.40]      | <0.01   |
|                               | 3    | 12.40 [9.70-18.10]      | 5.85 [3.35-10.43]      | <0.01   |
|                               | 7    | 15.35 [11.98-21.50]     | 5.40 [2.80-6.70]       | <0.01   |
| Procalcitonin, $\text{mg/mL}$ | 1    | 0.10 [0.06-0.24]        | 0.32 [0.12-1.04]       | <0.01   |
|                               | 3    | 0.10 [0.05-0.18]        | 0.39 [0.14-2.10]       | <0.01   |
|                               | 7    | 0.09 [0.05-0.27]        | 0.46 [0.14-1.52]       | <0.01   |
| PT, seconds                   | 1    | 12.60 [11.63-13.50]     | 13.25 [12.18-15.33]    | <0.01   |
|                               | 3    | 12.7 [11.65-13.38]      | 14.20 [12.85-15.85]    | <0.01   |
|                               | 7    | 12.25 [11.50-13.20]     | 13.60 [12.53-15.30]    | <0.01   |
| APTT, seconds                 | 1    | 31.60 [27.80-34.70]     | 32.00 [27.95-41.50]    | 0.11    |
|                               | 3    | 30.35 [26.55-35.18]     | 34.40 [28.35-41.55]    | 0.02    |
|                               | 7    | 30.00 [26.55-36.03]     | 35.65 [30.35-42.98]    | <0.01   |
| WBC, $\times 10^9/\text{L}$   | 1    | 7.32 [5.17-10.08]       | 9.59 [7.02-13.40]      | <0.01   |
|                               | 3    | 7.03 [5.01-9.46]        | 9.09 [7.27-12.11]      | <0.01   |
|                               | 7    | 6.86 [5.60-8.87]        | 11.26 [7.52-13.79]     | <0.01   |

|                 |   |                  |                  |       |
|-----------------|---|------------------|------------------|-------|
| hs-CTn I, ng/mL | 1 | 0.01 [0.01-0.03] | 0.03 [0.02-0.09] | <0.01 |
|                 | 3 | 0.02 [0.01-0.05] | 0.06 [0.03-0.21] | <0.01 |
|                 | 7 | 0.03 [0.01-0.09] | 0.07 [0.03-0.23] | 0.01  |
